# Supplementary material for: Relationship between pulmonary matrix metalloproteinases and quantitative CT markers of small airways disease and emphysema in COPD
Source: HighWire-hosted journal article supplement (doi:10.1136/thoraxjnl-2015-207428), 2015-12-08
Supplement: thoraxjnl-2015-207428supp.pdf [file thoraxjnl-2015-207428supp.pdf]

## Supplementary data

### Supplementary Methods

The sensitivities for the MMP Luminex assays were MMP-1 1.1pg/ml, MMP-2 12.6pg/ml, MMP-3 7.3pg/ml, MMP-7 6.6pg/ml, MMP-8 16.6pg/ml, MMP-9 13.7pg/ml, MMP-10 3.2pg/ml, MMP-12 0.7pg/ml, MMP-13 63.5pg/ml, EMPRIN 5.6pg/ml.

The sensitivities for the TIMP Luminex assays were TIMP-1 3.43 pg/ml, TIMP-2 40.1pg/ml, TIMP-3, 20.0pg/ml, TIMP-4 0.28pg/ml.

The sensitivities for the cytokine Luminex assays were IL1 $\beta$  0.18pg/ml, IL-2 0.28pg/ml, IL-6 0.31pg/ml, IL-8 0.07pg/ml, IL-10 0.24, IFN-g 0.08pg/ml and TNF- $\alpha$  0.54pg/ml.

**Supplementary Table 1** Partial Spearman correlation coefficients between CT markers and the MMP with the strongest bivariate correlation, controlling for the effect of each other MMP in turn

|          | Controlling for:           |                            |                            |                            |                           |                            |                            |                            |                            |
|----------|----------------------------|----------------------------|----------------------------|----------------------------|---------------------------|----------------------------|----------------------------|----------------------------|----------------------------|
|          | MMP1                       | MMP2                       | MMP3                       | MMP7                       | MMP8                      | MMP9                       | MMP10                      | MMP12                      | MMP13                      |
| FEV1%    | -0.54<br>( <i>p</i> =.008) | -0.56<br>( <i>p</i> =.005) | -0.58<br>( <i>p</i> =.004) | -0.53<br>( <i>p</i> =.01)  |                           | -0.20<br>( <i>p</i> =.370) | -0.58<br>( <i>p</i> =.003) | -0.42<br>( <i>p</i> =.048) | -0.60<br>( <i>p</i> =.002) |
| FEF25/75 | -0.53<br>( <i>p</i> =.010) | -0.56<br>( <i>p</i> =.006) | -0.62<br>( <i>p</i> =.002) | -0.65<br>( <i>p</i> =.001) |                           | -0.25<br>( <i>p</i> =.247) | -0.61<br>( <i>p</i> =.002) | -0.48<br>( <i>p</i> =.021) | -0.61<br>( <i>p</i> =.002) |
| LAA%     | 0.53<br>( <i>p</i> =.009)  | 0.57<br>( <i>p</i> =.005)  | 0.32<br>( <i>p</i> =.139)  | 0.33<br>( <i>p</i> =.124)  | 0.46<br>( <i>p</i> =.026) | 0.46<br>( <i>p</i> =.027)  |                            | 0.51<br>( <i>p</i> =.013)  | 0.56<br>( <i>p</i> =.006)  |
| EI/MLD   | 0.66<br>( <i>p</i> =.007)  | 0.60<br>( <i>p</i> =.019)  | 0.46<br>( <i>p</i> =.083)  | 0.37<br>( <i>p</i> =.172)  |                           | 0.28<br>( <i>p</i> =.318)  | 0.46<br>( <i>p</i> =.084)  | 0.38<br>( <i>p</i> =.161)  | 0.60<br>( <i>p</i> =.019)  |

N=24 except for EI/MLD (N=16).

MMP8 had the strongest bivariate correlation with all CT markers apart from LAA%, which had the strongest bivariate correlation with MMP10.

**Supplementary Table 2** Spearman's correlation analysis between cytokines, neutrophils and lung function and CT measures of disease in COPD subjects

|                                 | IL-1 $\beta$  | IL-6  | IL-8           | GM-CSF | Neutrophils |
|---------------------------------|---------------|-------|----------------|--------|-------------|
| FEV1%                           | -0.16         | -0.39 | <b>-0.41*</b>  | -0.05  | -0.40       |
| FEF75-25%                       | <b>-0.44*</b> | -0.37 | <b>-0.57**</b> | -0.18  | -0.18       |
| Emphysema % (LAA%)              | -0.30         | 0.28  | 0.22           | -0.13  | 0.36        |
| Small airways Disease (E/I MLD) | 0.12          | 0.29  | <b>0.53*</b>   | -0.19  | 0.43        |
| Bronchial wall area (Pi10)      | 0.05          | -0.10 | 0.10           | 0.09   | 0.10        |

Spearman's rho values given.

N=24, apart from associations with E/I MLD (n=16)

\* *p*<0.05 \*\**p*<0.01 \*\*\**p*<0.001
